# Supplementary material
Source: ML conference proceedings conference paper supplement (https://www.ecva.net/papers/eccv_2020/papers_ECCV/html/123680545_ECCV_2020_paper.php)
Supplement: Supplementary file 2 [file 123680545-supp.zip]

# Supplementary – LevelSet R-CNN: A Deep Variational Method for Instance Segmentation

Namdar Homayounfar<sup>\*1,2</sup> Yuwen Xiong<sup>\*1,2</sup> Justin Liang<sup>\*1</sup>  
Wei-Chiu Ma<sup>1,3</sup> Raquel Urtasun<sup>1,2</sup>  
{namdar,yuwen,justin.liang,weichiu,urtasun}@uber.com

<sup>1</sup> Uber Advanced Technologies Group

<sup>2</sup> University of Toronto

<sup>3</sup> MIT

In Section 1 of this supplementary material, we present the architectural details of our model. In section 2 we showcase more qualitative examples.

## 1 Architecture

The **Resnet-FPN** backbone, the bounding box head and the classification head of our model (shown in Figure 1) follow the original architecture of [1]. In our experiments, we use **Resnet-50** [2] and **WideResnet-38** [3] as the residual backbones of our model. Next, we describe the architecture details of the initial truncated signed distance function (TSDF) head, the hyperparameter head and the Chan-Vese feature head.

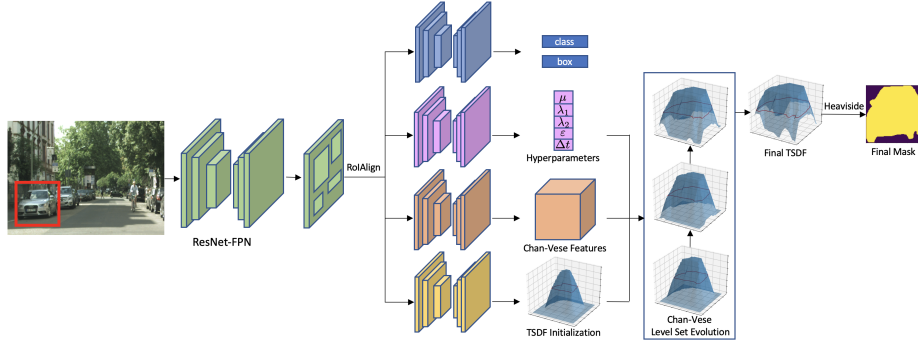

**Fig.1. Our Model for Instance Segmentation:** We build on top of Mask R-CNN to first detect and classify all objects in the image. Then for each detection, the corresponding RoI is fed to a series of convolutions to obtain a truncated signed distance function (TSDF) initialization, a deep feature tensor, and a set of instance aware adaptive hyperparameters. These in turn are inputted into an unrolled Chan-Vese level set optimization procedure which outputs a final TSDF. We obtain a mask by applying the Heaviside function to the TSDF.

### 1.1 Initial TSDF Head

The TSDF head outputs an unrestricted TSDF for TSDF initialization as shown in Figure 1. The ground truth TSDF is truncated at a threshold of  $\lfloor \frac{\text{Mask Dim}}{7} \rfloor$ , i.e. 4 for a mask of  $28 \times 28$ . The following Table 1 shows the exact architecture.

| Type                 | Input Size (C × H × W)    | Filters @ Kernel Size | Output Size (C × H × W)   |
|----------------------|---------------------------|-----------------------|---------------------------|
| Convolution + ReLU   | $256 \times 14 \times 14$ | $256 @ 3 \times 3$    | $256 \times 14 \times 14$ |
| Convolution + ReLU   | $256 \times 14 \times 14$ | $256 @ 3 \times 3$    | $256 \times 14 \times 14$ |
| Convolution + ReLU   | $256 \times 14 \times 14$ | $256 @ 3 \times 3$    | $256 \times 14 \times 14$ |
| Convolution + ReLU   | $256 \times 14 \times 14$ | $256 @ 3 \times 3$    | $256 \times 14 \times 14$ |
| DeConvolution + ReLU | $256 \times 14 \times 14$ | $256 @ 2 \times 2$    | $256 \times 28 \times 28$ |
| Convolution          | $256 \times 28 \times 28$ | $8 @ 1 \times 1$      | $8 \times 28 \times 28$   |

**Table 1.** The initial TSDF head architecture.

### 1.2 Hyperparameter Head

The hyperparameter head outputs a vector of size  $2N + 3$  for hyperparameters  $\{\mu(r_m), \lambda_1(r_m), \lambda_2(r_m), \varepsilon_{1:N}(r_m), \Delta t_{1:N}(r_m)\}$  for each RoI  $r_m$  as shown in Figure 1. Here  $N$  corresponds to the number of unrolled optimization steps. In Table 2 we present the exact architecture.

| Type                             | Input Size (C × H × W)    | Filters @ Kernel Size | Output Size (C × H × W)      |
|----------------------------------|---------------------------|-----------------------|------------------------------|
| Convolution + ReLU               | $256 \times 28 \times 28$ | $256 @ 3 \times 3$    | $256 \times 14 \times 14$    |
| Avg Pooling                      | $256 \times 14 \times 14$ |                       | $256 \times 1 \times 1$      |
| Convolution + ReLU               | $256 \times 1 \times 1$   | $256 @ 1 \times 1$    | $256 \times 1 \times 1$      |
| Convolution + ReLU               | $256 \times 1 \times 1$   | $128 @ 1 \times 1$    | $128 \times 1 \times 1$      |
| Convolution + $2 \times$ Sigmoid | $128 \times 1 \times 1$   | $2N + 3 @ 1 \times 1$ | $(2N + 3) \times 1 \times 1$ |

**Table 2.** The hyperparameter head architecture.

### 1.3 Chan-Vese Features Head

In Table 3 we showcase the exact architecture of the Chan-Vese feature head. In our experiments we found the channel size of 64 and dimensions of 112 to be effective in terms of memory.

| Type                 | Input Size (C × H × W)     | Filters @ Kernel Size | Output Size (C × H × W)    |
|----------------------|----------------------------|-----------------------|----------------------------|
| Convolution + ReLU   | $256 \times 56 \times 56$  | $64 @ 3 \times 3$     | $64 \times 56 \times 56$   |
| Convolution + ReLU   | $64 \times 56 \times 56$   | $64 @ 3 \times 3$     | $64 \times 56 \times 56$   |
| Convolution + ReLU   | $64 \times 56 \times 56$   | $64 @ 3 \times 3$     | $64 \times 56 \times 56$   |
| DeConvolution + ReLU | $64 \times 56 \times 56$   | $64 @ 2 \times 2$     | $64 \times 112 \times 112$ |
| Convolution          | $64 \times 112 \times 112$ | $64 @ 3 \times 3$     | $64 \times 112 \times 112$ |

**Table 3.** The Chan-Vese features head architecture.

## 2 Qualitative Results

In Figures 2 and 3 we showcase the input image, our state-of-the-art results with the **WideResnet-38** backbone (without test time augmentation or COCO pre-training) and the corresponding GT on the Cityscapes validation set. In Figures 4 and 5 we showcase our model with the **Resnet-50** backbone on the validation set of COCO dataset.

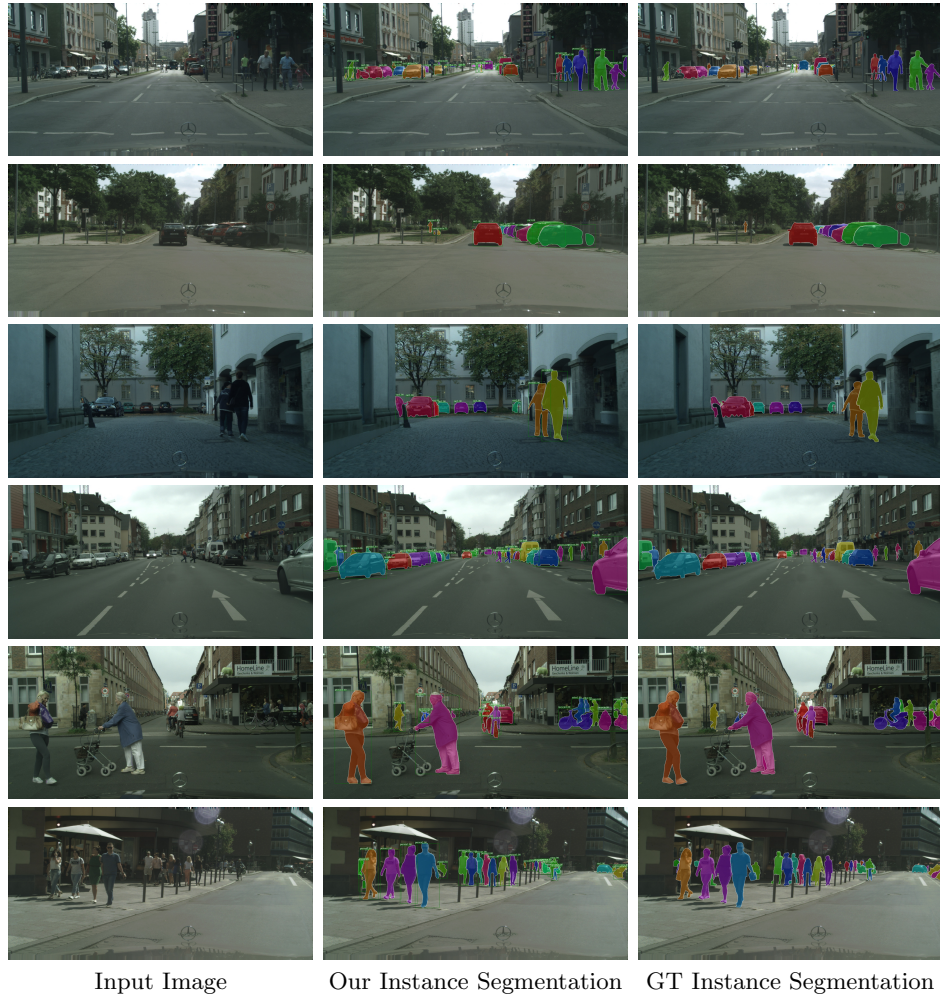

**Fig. 2.** We showcase qualitative instance segmentation results of our model on the Cityscapes validation set.

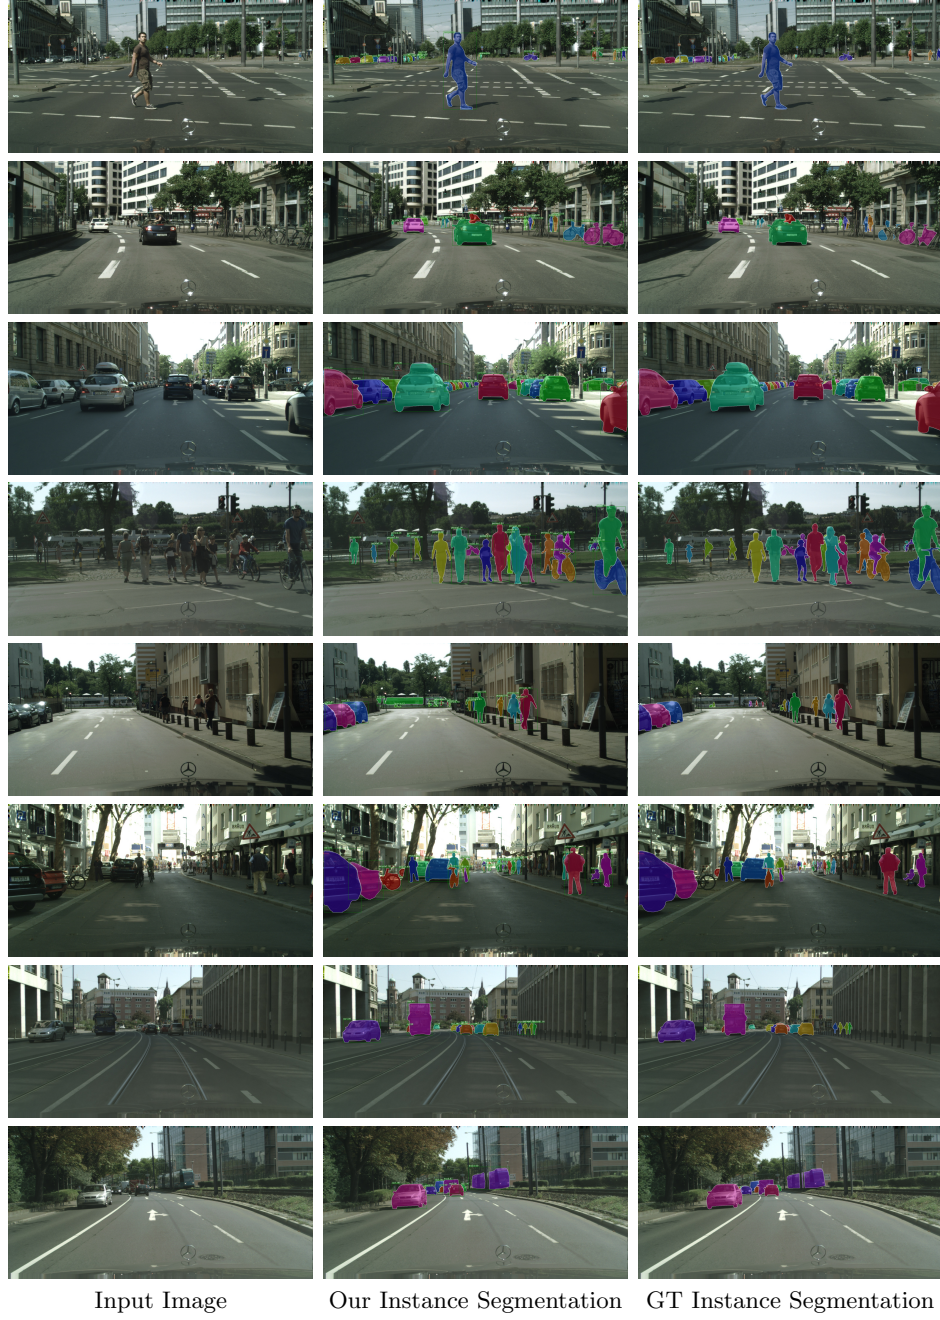

**Fig. 3.** We showcase qualitative instance segmentation results of our model on the Cityscapes validation set.



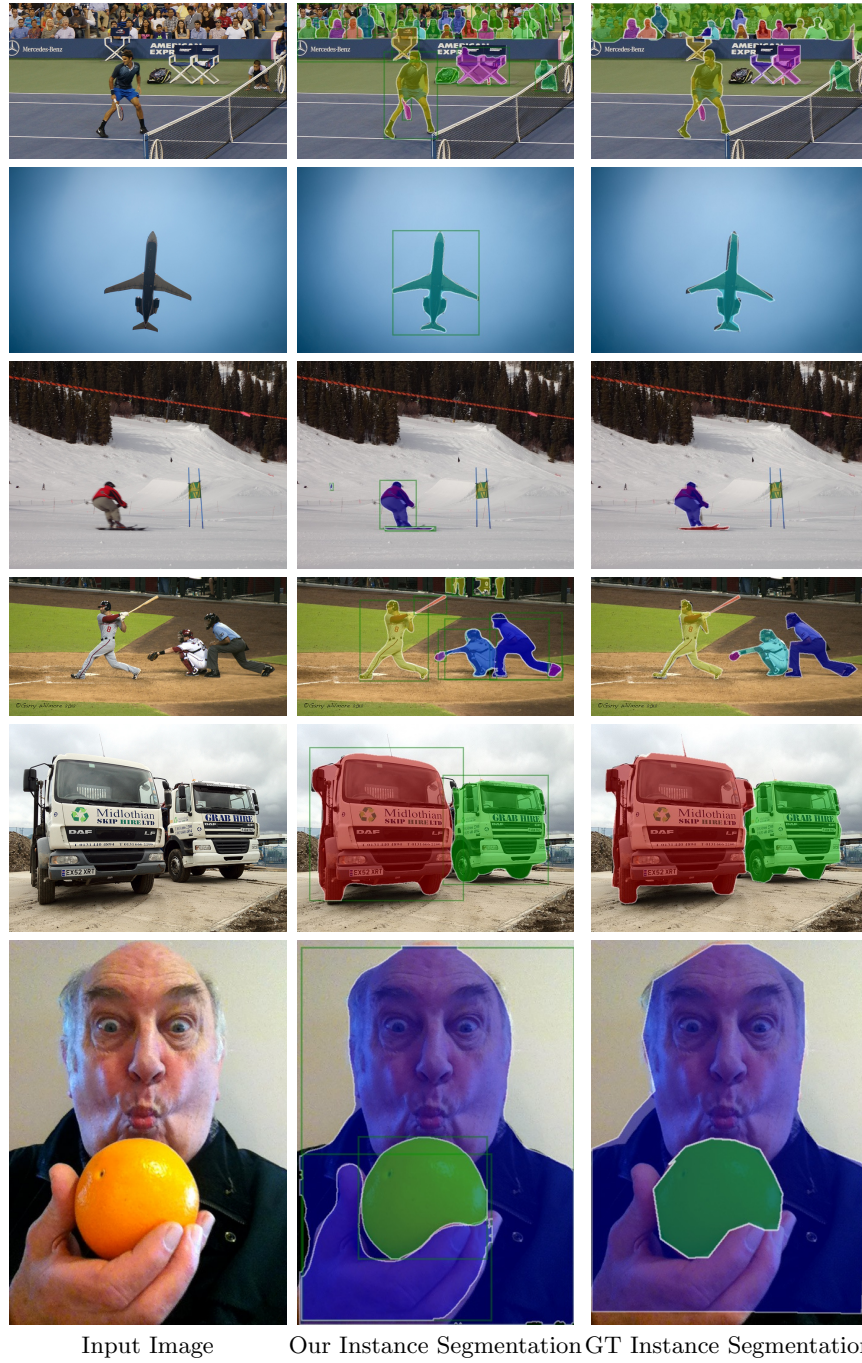

**Fig. 4.** We showcase qualitative instance segmentation results of our model on the COCO validation set.

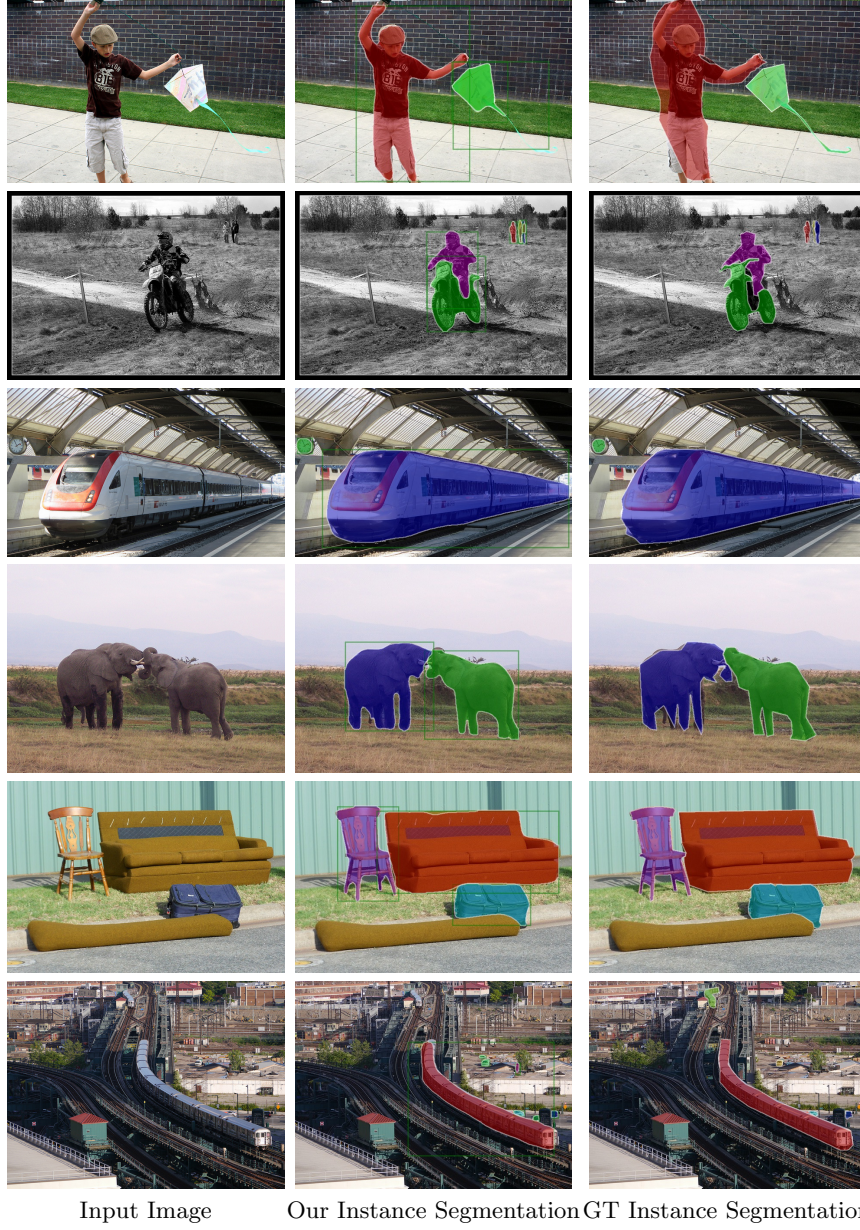

**Fig. 5.** We showcase qualitative instance segmentation results of our model on the COCO validation set.

## References

1. He, K., Gkioxari, G., Dollár, P., Girshick, R.: Mask r-cnn. In: CVPR (2017)
2. He, K., Zhang, X., Ren, S., Sun, J.: Deep residual learning for image recognition. CVPR (2015)
3. Zagoruyko, S., Komodakis, N.: Wide residual networks. In: BMVC (2016)
