# Supplementary material
Source: ML conference proceedings conference paper supplement (https://www.ecva.net/papers/eccv_2020/papers_ECCV/html/123680545_ECCV_2020_paper.php)
Supplement: Supplementary file 3 [file 123680545-supp.zip]

Archive with 12 entries (10 files):
- 4368-supp/
- 4368-supp/.DS_Store
- __MACOSX/4368-supp/._.DS_Store
- 4368-supp/videos/
- 4368-supp/4368-supp.pdf
- __MACOSX/4368-supp/._4368-supp.pdf
- 4368-supp/videos/stuttgart_00.mp4
- __MACOSX/4368-supp/videos/._stuttgart_00.mp4
- 4368-supp/videos/stuttgart_01.mp4
- __MACOSX/4368-supp/videos/._stuttgart_01.mp4
- 4368-supp/videos/stuttgart_02.mp4
- __MACOSX/4368-supp/videos/._stuttgart_02.mp4
